# Supplementary material for: Cognitive reserve and network efficiency as compensatory mechanisms of the effect of aging on phonemic fluency
Source: publisher site journal article supplement (doi:10.18632/aging.202177), 2020-11-17
Supplement: Supplementary file [file aging-v12i22-202177-supplementary-material-SD1.pdf]

SUPPLEMENTARY FIGURES

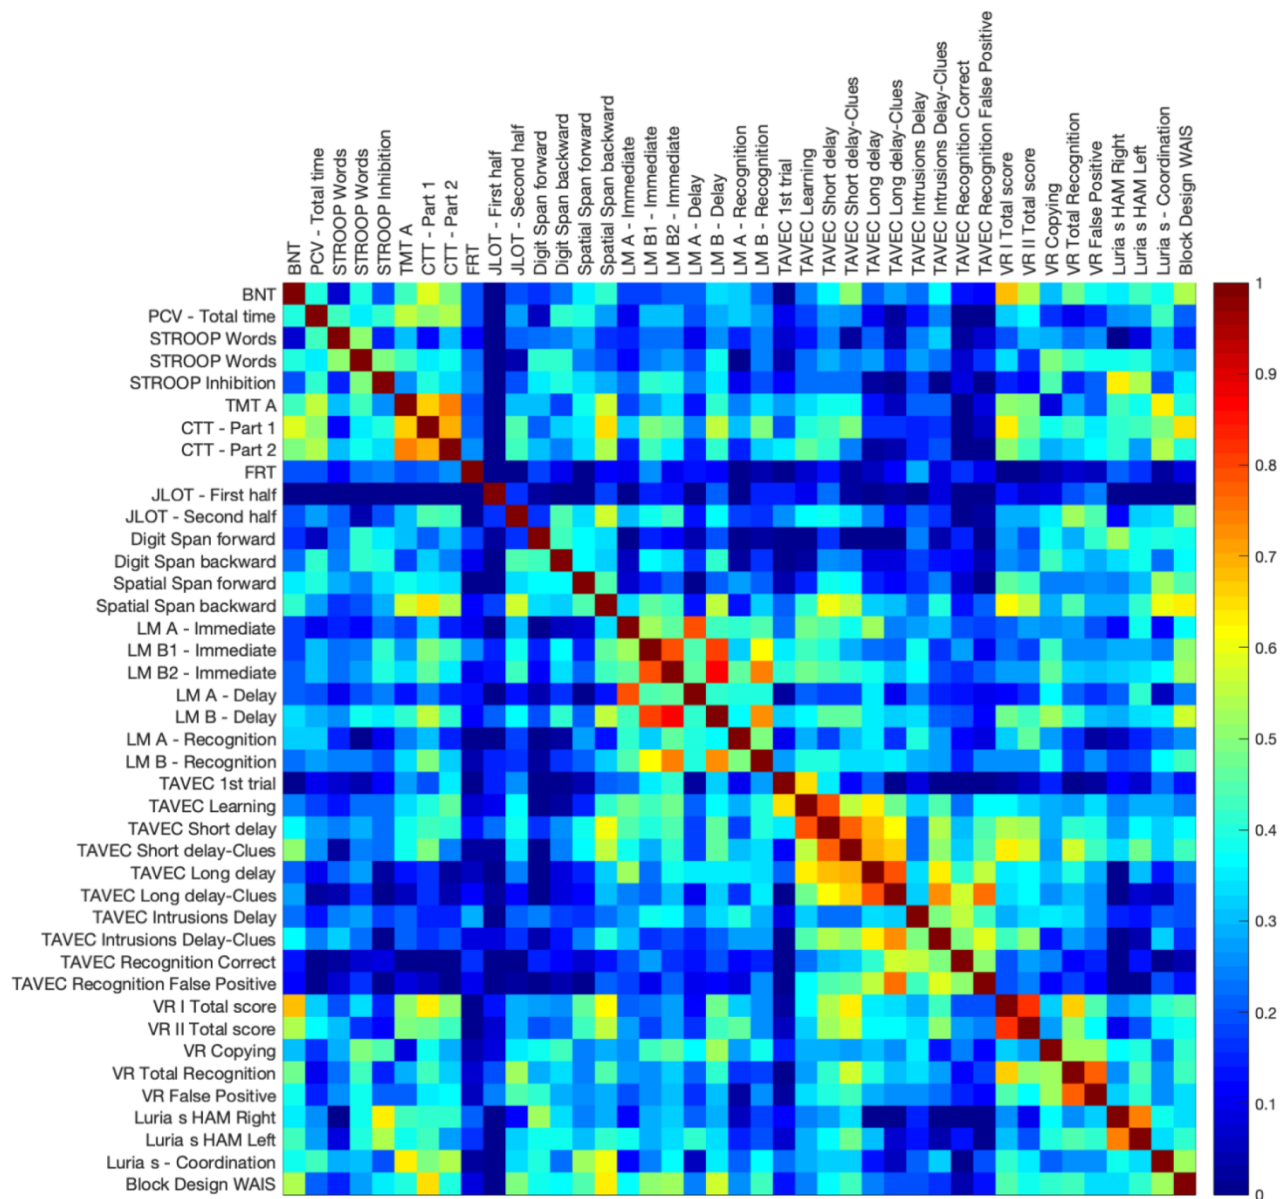

**Supplementary Figure 1. Weighted correlation matrix (YA+lowCR).** YA, younger age. lowCR, low cognitive reserve. The color bar indicates the strength of the Pearson correlation coefficients: colder colors represent weaker correlations, while warmer colors represent stronger correlations.

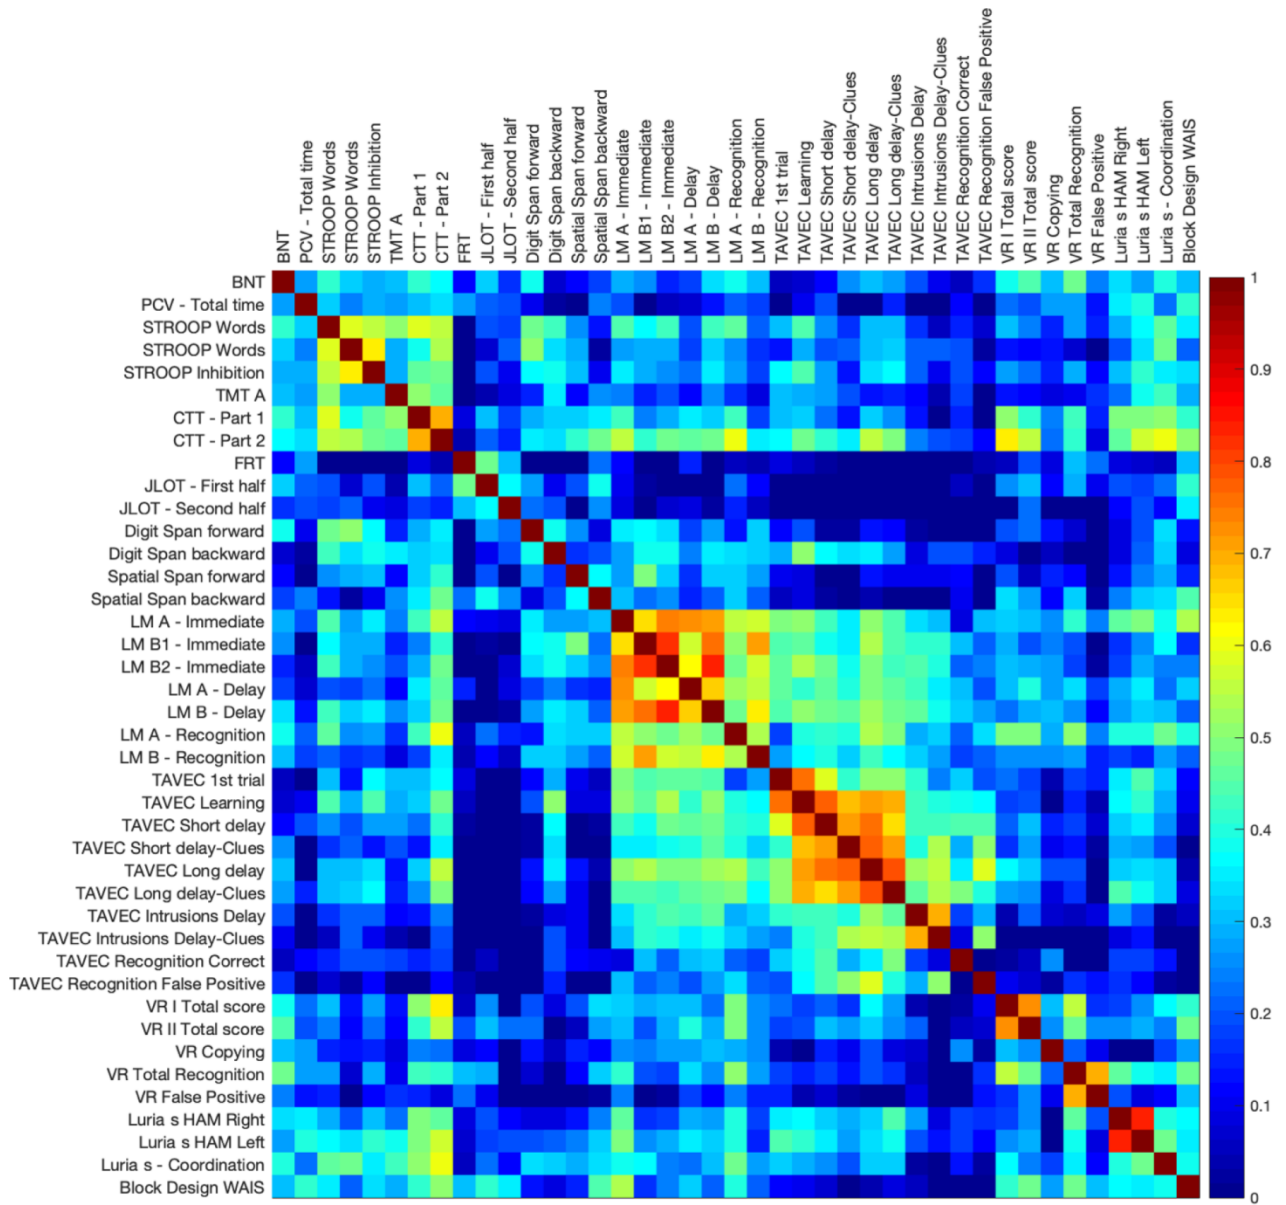

**Supplementary Figure 2. Weighted correlation matrix (OA+lowCR).** OA, older age. lowCR, low cognitive reserve. The color bar indicates the strength of the Pearson correlation coefficients: colder colors represent weaker correlations, while warmer colors represent stronger correlations.

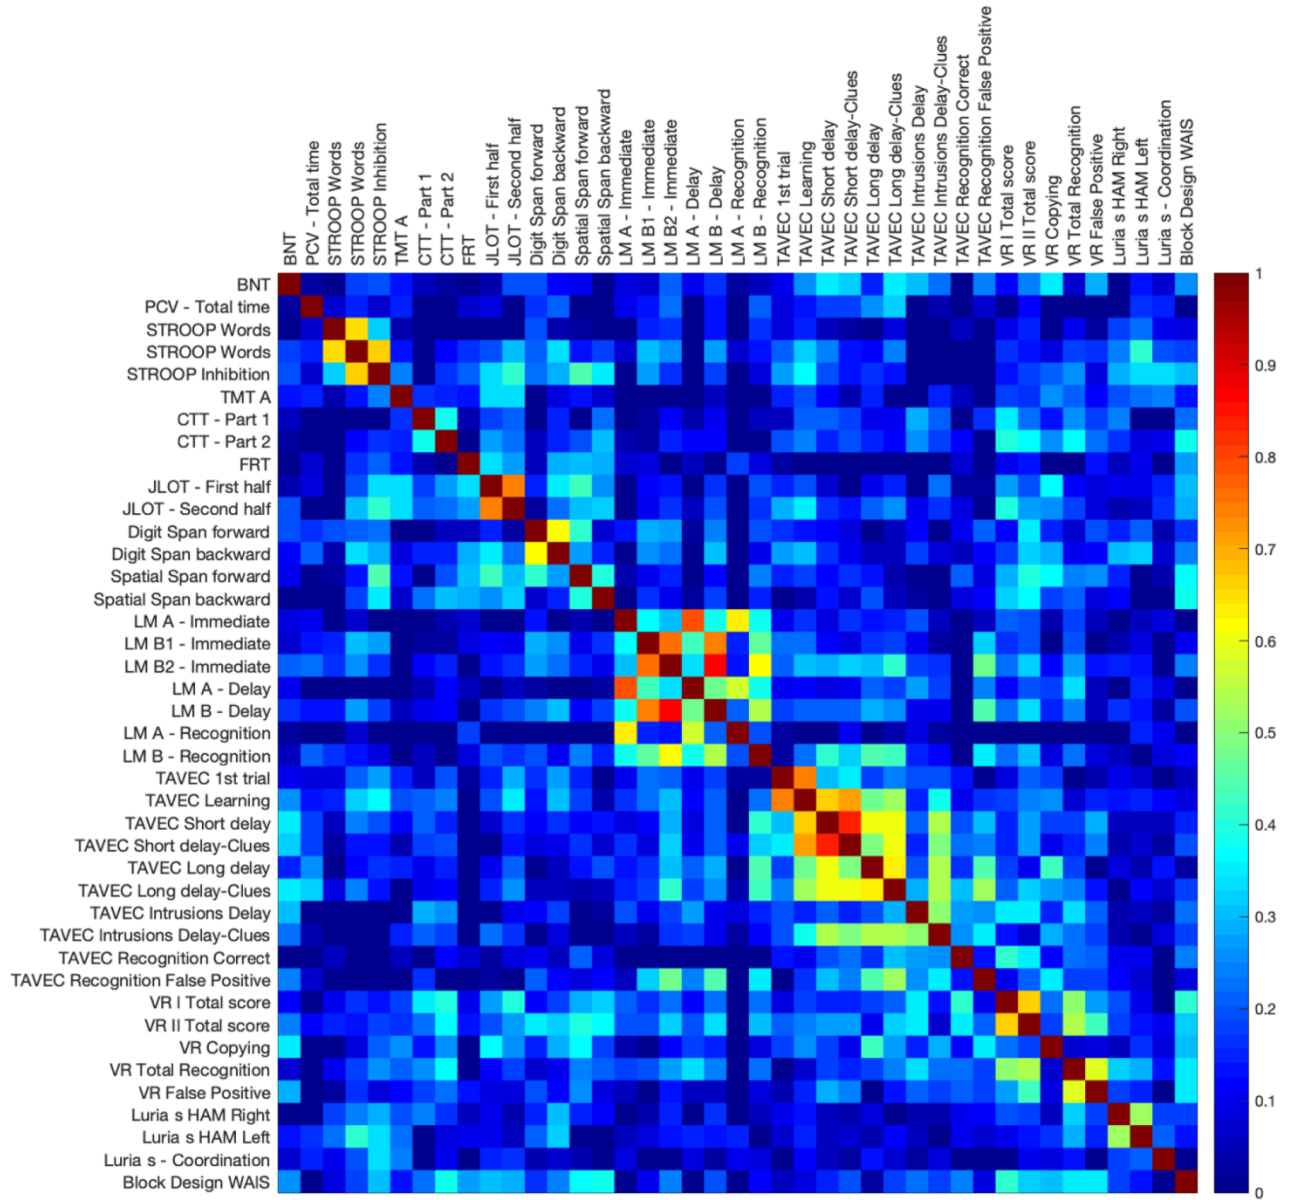

**Supplementary Figure 3. Weighted correlation matrix (YA+highCR).** YA, younger age. highCR, high cognitive reserve. The color bar indicates the strength of the Pearson correlation coefficients: colder colors represent weaker correlations, while warmer colors represent stronger correlations.

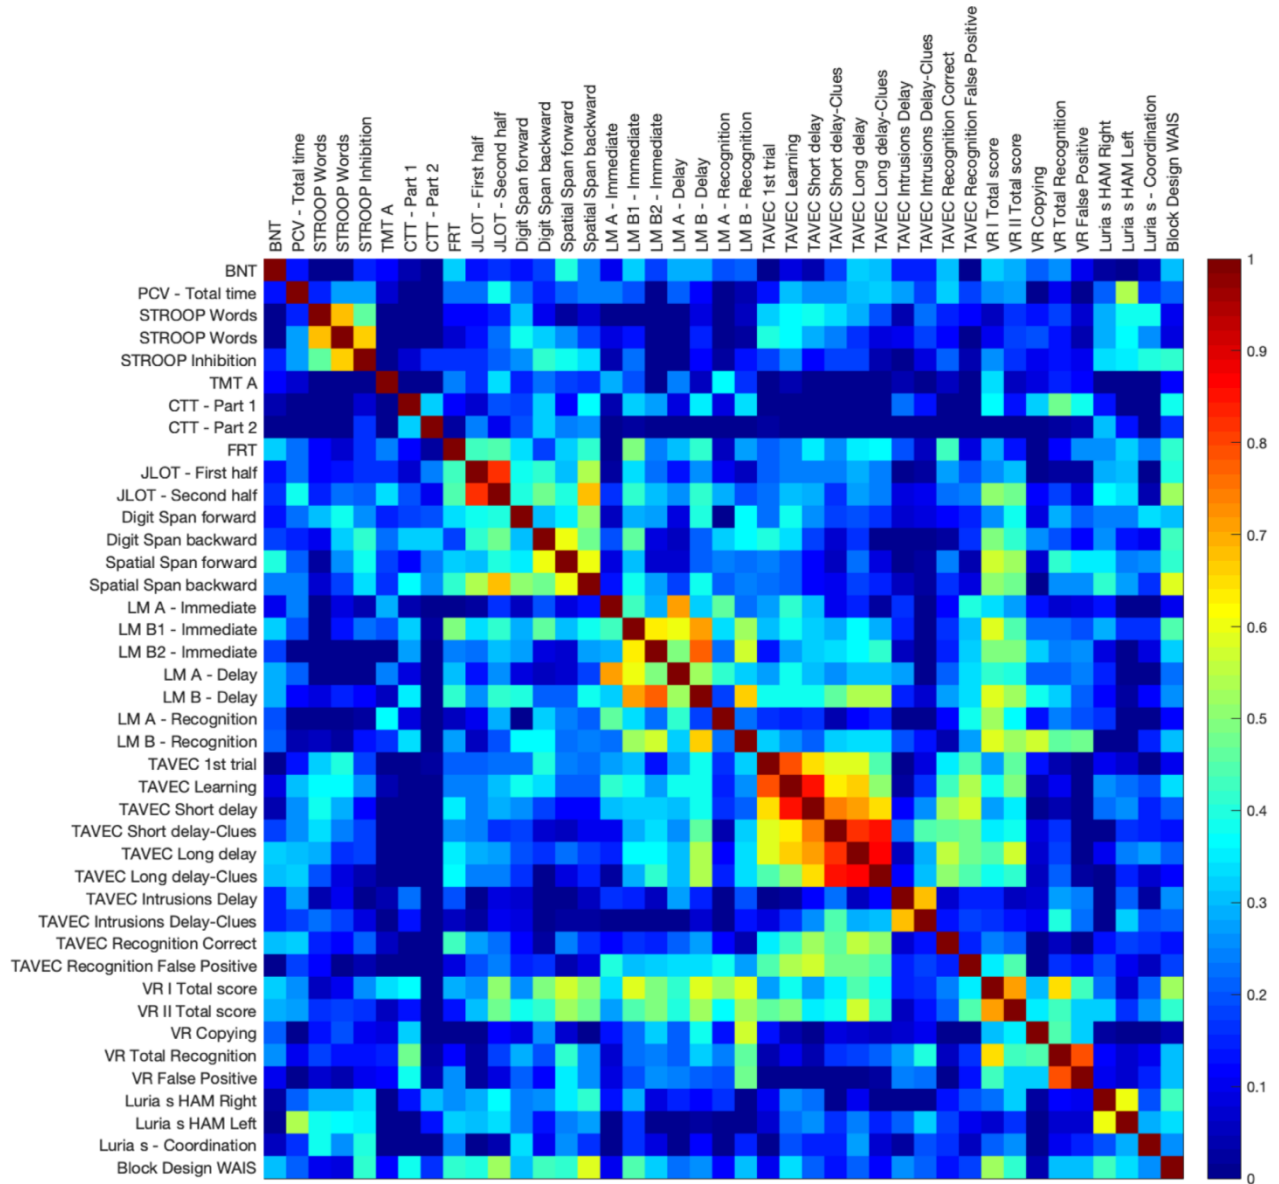

**Supplementary Figure 4. Weighted correlation matrix (OA+highCR).** OA, older age. highCR, high cognitive reserve. The color bar indicates the strength of the Pearson correlation coefficients: colder colors represent weaker correlations, while warmer colors represent stronger correlations.

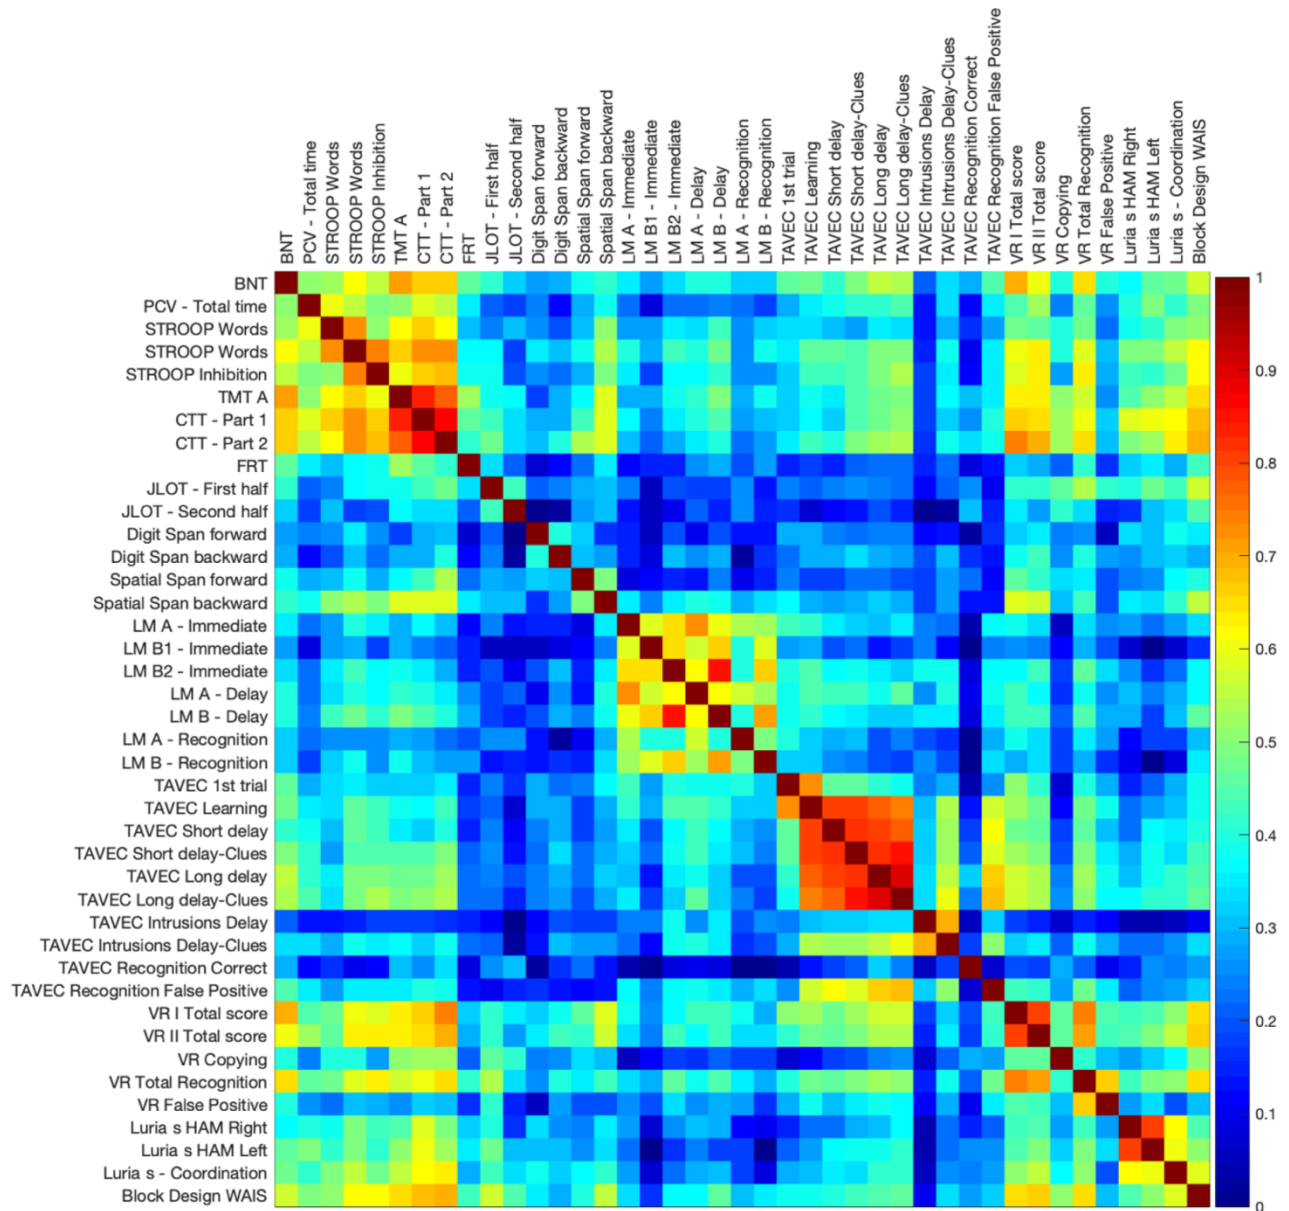

**Supplementary Figure 5. Weighted correlation matrix (LowPF+lowCR).** LowPF, low phonemic fluency performance. lowCR: low cognitive reserve. The color bar indicates the strength of the Pearson correlation coefficients: colder colors represent weaker correlations, while warmer colors represent stronger correlations.

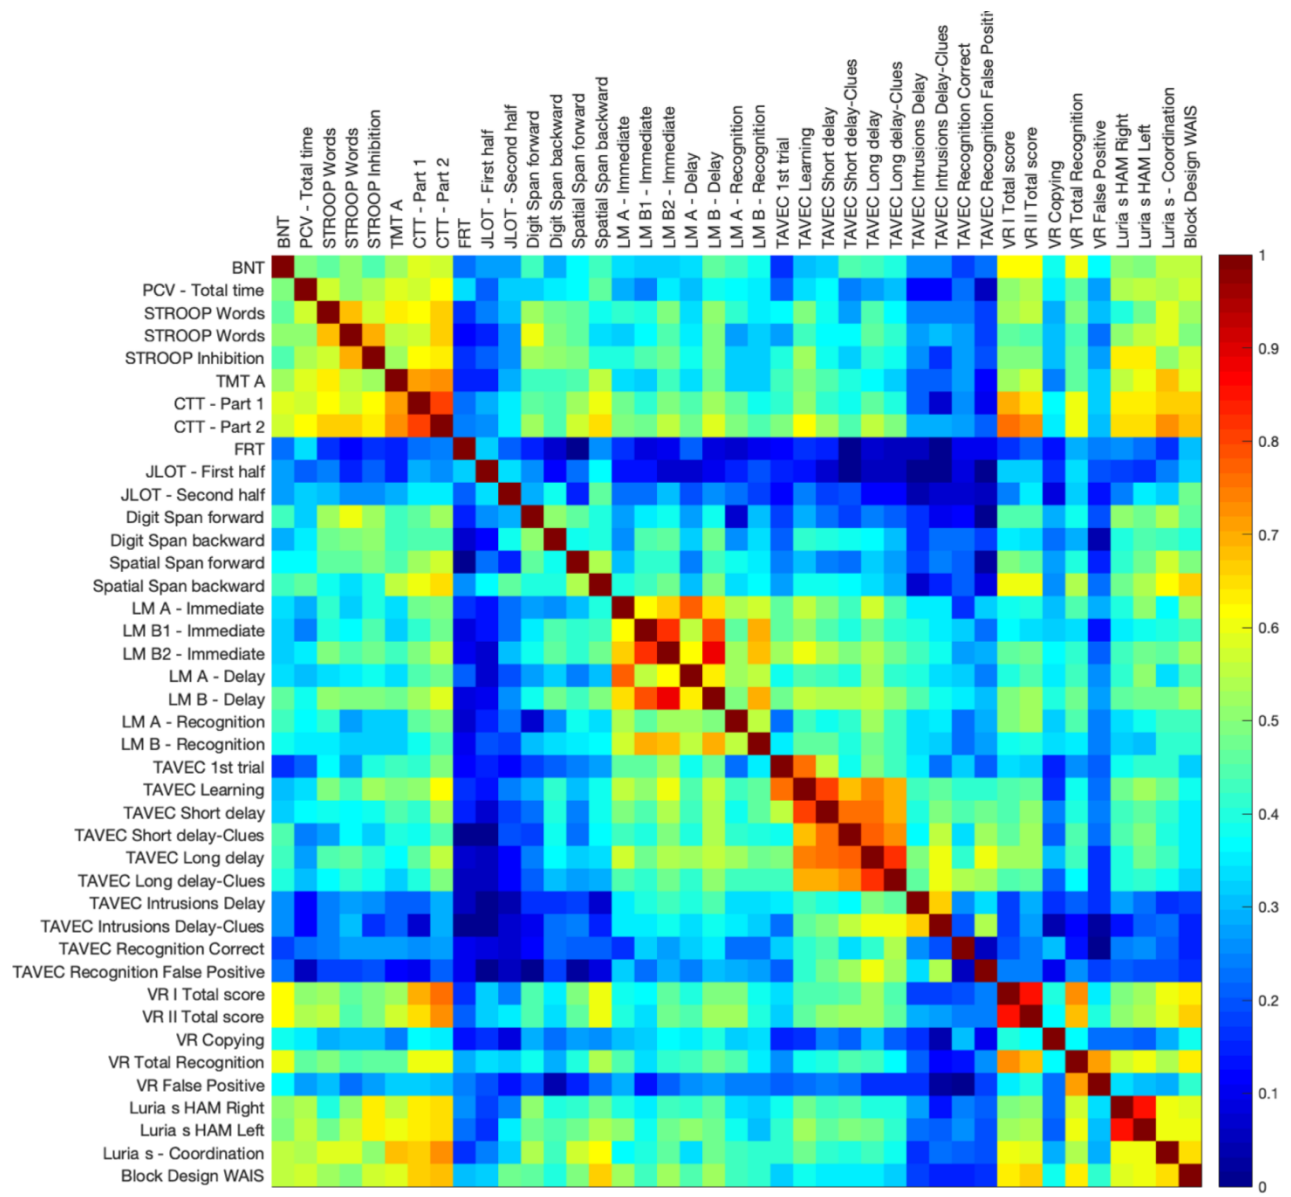

**Supplementary Figure 6. Weighted correlation matrix (HighPF+lowCR).** HighPF, high phonemic fluency performance. lowCR: low cognitive reserve. The color bar indicates the strength of the Pearson correlation coefficients: colder colors represent weaker correlations, while warmer colors represent stronger correlations.

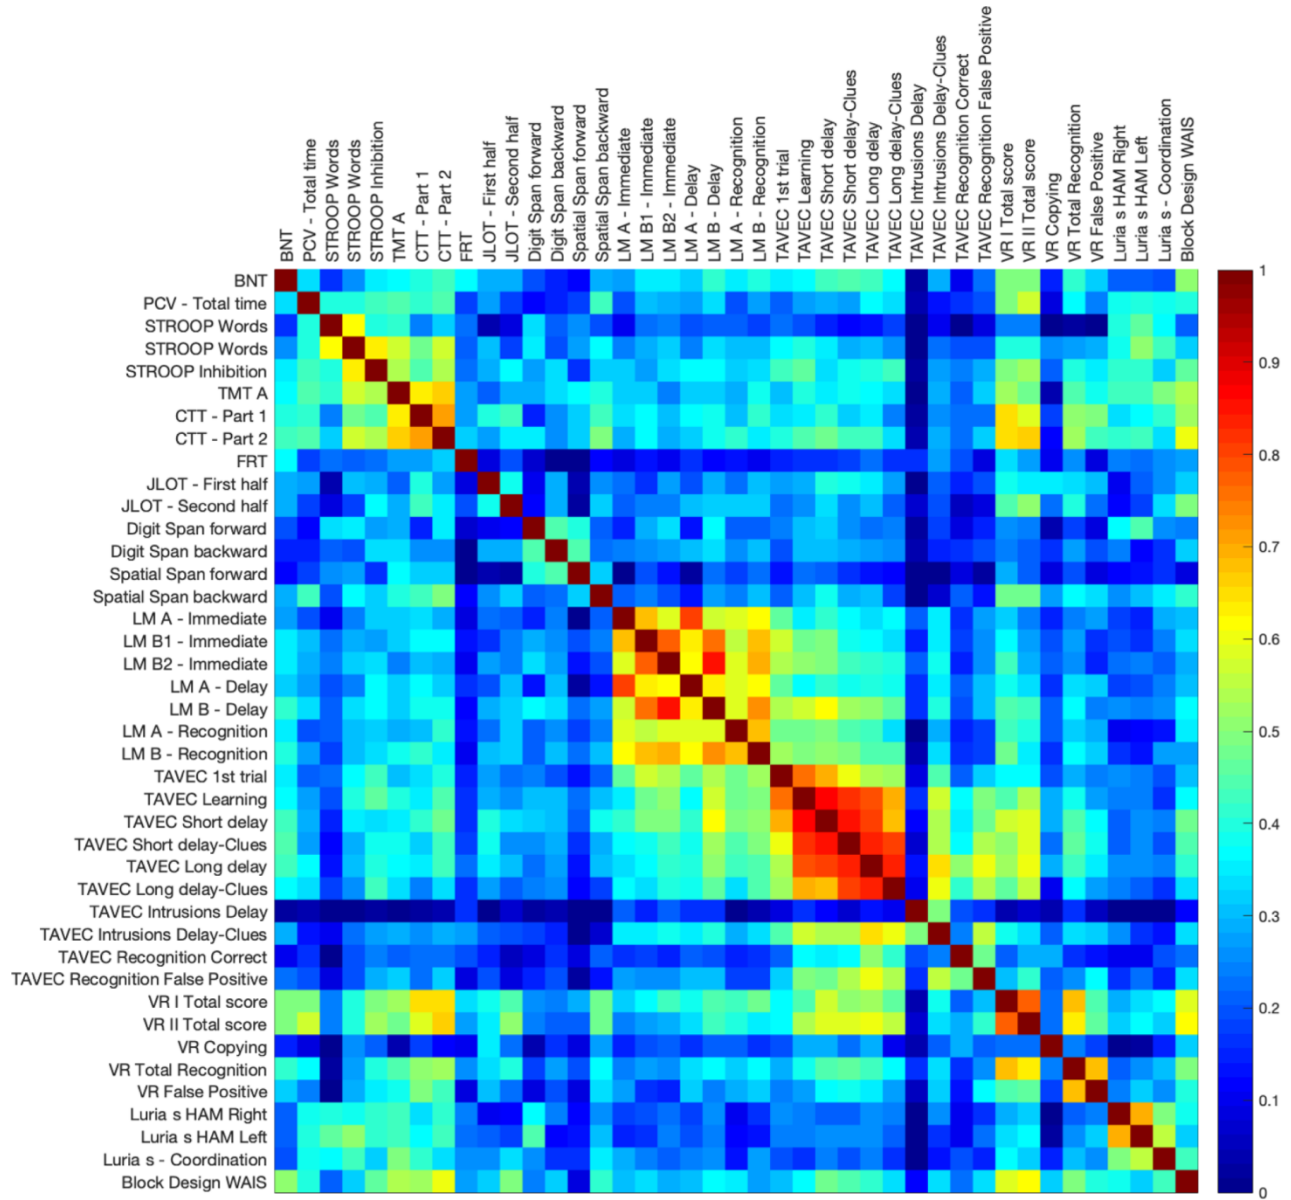

**Supplementary Figure 7. Weighted correlation matrix (LowPF+highCR).** LowPF, low phonemic fluency performance. highCR: high cognitive reserve. The color bar indicates the strength of the Pearson correlation coefficients: colder colors represent weaker correlations, while warmer colors represent stronger correlations.

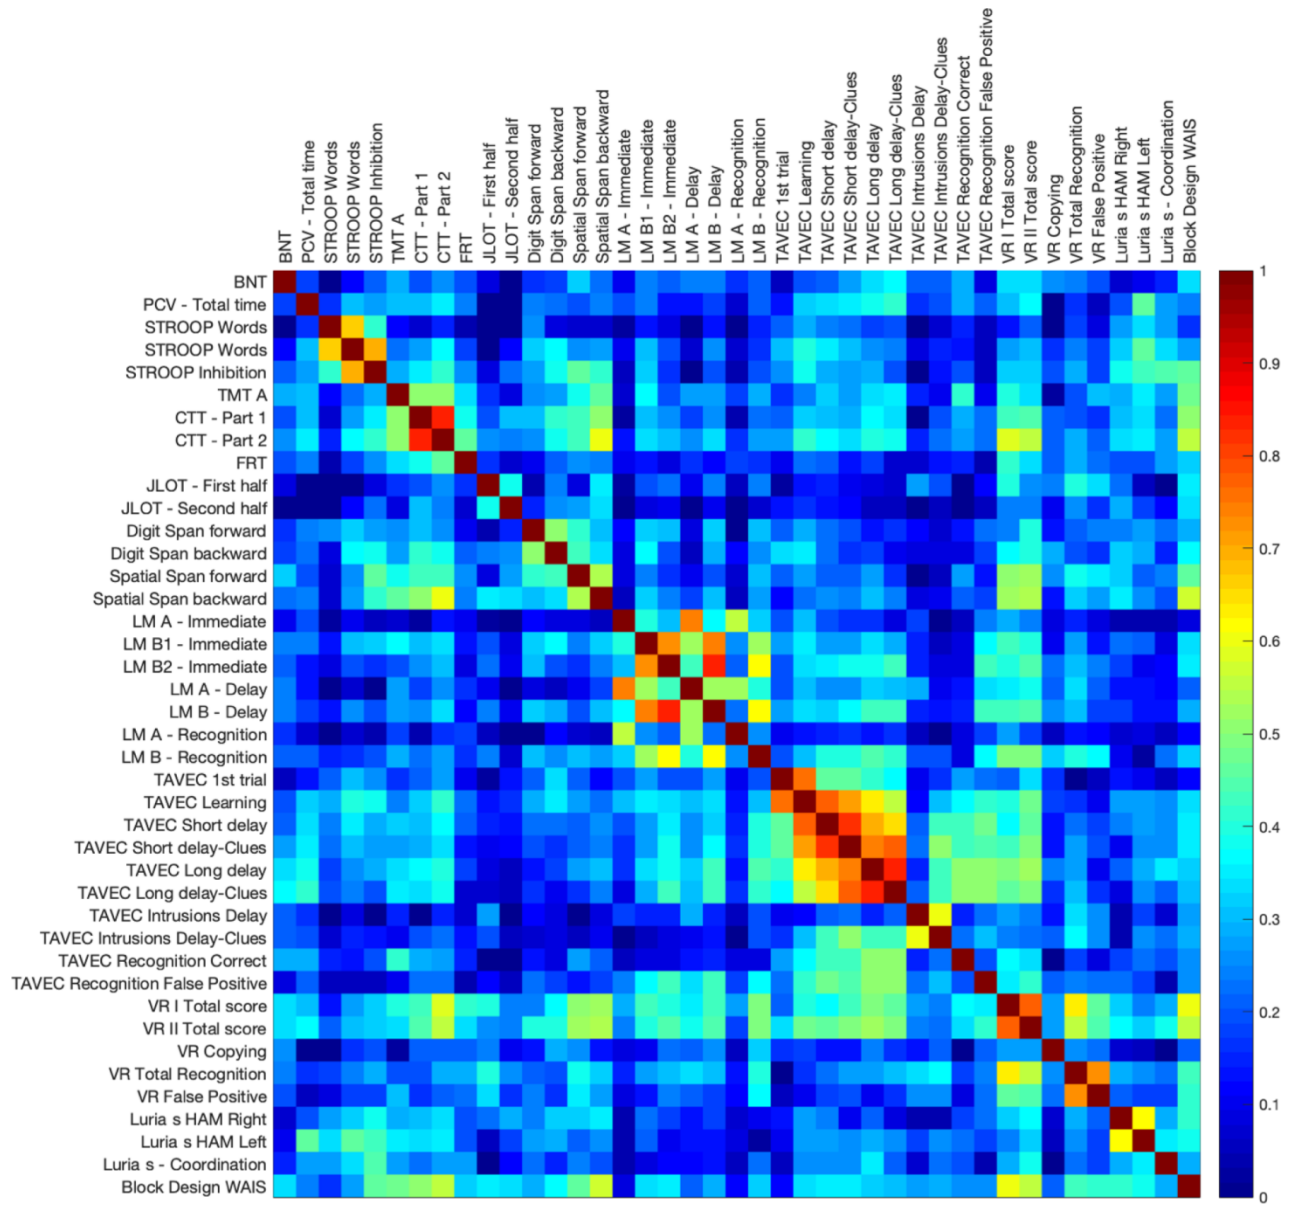

**Supplementary Figure 8. Weighted correlation matrix (HighPF+highCR), HighPF, high phonemic fluency performance.** highCR: high cognitive reserve. The color bar indicates the strength of the Pearson correlation coefficients: colder colors represent weaker correlations, while warmer colors represent stronger correlations.
