# Supplementary material for: Cognitive reserve and network efficiency as compensatory mechanisms of the effect of aging on phonemic fluency
Source: publisher site journal article supplement (doi:10.18632/aging.202177), 2020-11-17
Supplement: Supplementary file [file aging-v12i22-202177-supplementary-material-SD2.pdf]

## SUPPLEMENTARY TABLE

**Supplementary Table 1. Performance in neuropsychological test by group.**

|                                   |    | Low Cognitive Reserve (lowCR) |        |                          |        | High Cognitive Reserve (highCR) |        |                         |        |
|-----------------------------------|----|-------------------------------|--------|--------------------------|--------|---------------------------------|--------|-------------------------|--------|
|                                   |    | Younger-age<br>(YA, n=95)     |        | Older-age<br>(OA, n=129) |        | Younger-age<br>(YA, n=127)      |        | Older-age<br>(OA, n=95) |        |
|                                   |    | LowPF                         | HighPF | LowPF                    | HighPF | LowPF                           | HighPF | LowPF                   | HighPF |
|                                   |    | <i>n</i>                      | 50     | 45                       | 68     | 61                              | 64     | 63                      | 50     |
| <b>Neuropsychological test</b>    |    |                               |        |                          |        |                                 |        |                         |        |
| BNT, score                        | M  | 24.7                          | 25.5   | 19.8                     | 21.9   | 28.3                            | 29.1   | 26.3                    | 28.0   |
|                                   | SD | 3.5                           | 3.2    | 4.7                      | 3.9    | 1.7                             | 1.2    | 2.2                     | 2.5    |
| PCV - Decision time, milliseconds | M  | 462.4                         | 463.3  | 576.9                    | 563.1  | 459.8                           | 456.3  | 554.5                   | 491.6  |
|                                   | SD | 64.3                          | 67.7   | 121.7                    | 109.9  | 61.7                            | 61.6   | 85.9                    | 82.2   |
| PCV - Motor time, milliseconds    | M  | 212.8                         | 191.2  | 294.1                    | 266.0  | 191.6                           | 181.3  | 243.2                   | 225.6  |
|                                   | SD | 53.0                          | 72.4   | 83.1                     | 71.3   | 54.0                            | 50.9   | 71.5                    | 62.3   |
| PASAT, score                      | M  | 58.7                          | 58.8   | 58.1                     | 58.4   | 59.0                            | 59.6   | 58.6                    | 59.5   |
|                                   | SD | 1.5                           | 2.6    | 3.6                      | 2.1    | 1.6                             | 1.0    | 2.2                     | 1.9    |
| STROOP Words, score               | M  | 92.2                          | 103.6  | 67.7                     | 78.2   | 103.9                           | 110.7  | 93.4                    | 106.6  |
|                                   | SD | 14.6                          | 18.6   | 19.9                     | 18.2   | 14.4                            | 12.8   | 14.7                    | 14.5   |
| STROOP Color, score               | M  | 64.7                          | 70.9   | 45.8                     | 53.5   | 69.1                            | 76.3   | 57.6                    | 68.7   |
|                                   | SD | 10.6                          | 12.7   | 10.8                     | 14.2   | 10.5                            | 11.1   | 11.3                    | 10.6   |
| STROOP Inhibition, score          | M  | 34.8                          | 40.5   | 22.0                     | 27.6   | 40.2                            | 44.8   | 30.8                    | 38.8   |
|                                   | SD | 8.4                           | 9.4    | 7.6                      | 9.9    | 8.0                             | 8.5    | 6.5                     | 8.3    |
| TMT A, seconds                    | M  | 42.3                          | 36.8   | 83.9                     | 62.9   | 33.4                            | 30.0   | 48.7                    | 41.3   |
|                                   | SD | 13.5                          | 12.6   | 34.6                     | 18.1   | 8.9                             | 8.3    | 15.8                    | 16.5   |
| CTT - Part 1, seconds             | M  | 51.9                          | 47.5   | 105.0                    | 83.8   | 40.0                            | 36.4   | 66.0                    | 49.6   |
|                                   | SD | 18.4                          | 17.2   | 34.8                     | 29.1   | 10.1                            | 10.7   | 26.0                    | 16.3   |
| CTT - Part 2, seconds             | M  | 117.5                         | 96.0   | 210.5                    | 172.7  | 91.3                            | 85.4   | 135.9                   | 115.7  |
|                                   | SD | 46.2                          | 37.2   | 57.4                     | 50.9   | 24.7                            | 22.5   | 42.8                    | 33.4   |
| FRT, score                        | M  | 22.2                          | 22.3   | 20.5                     | 21.4   | 23.0                            | 23.5   | 21.7                    | 21.7   |
|                                   | SD | 2.1                           | 1.9    | 2.3                      | 2.0    | 2.0                             | 2.0    | 1.9                     | 2.1    |
| JLOT - First half, score          | M  | 12.6                          | 12.9   | 10.6                     | 11.6   | 13.9                            | 13.9   | 13.2                    | 13.4   |
|                                   | SD | 2.0                           | 2.3    | 3.0                      | 2.8    | 1.2                             | 1.2    | 1.7                     | 1.4    |
| JLOT - Second half, score         | M  | 8.4                           | 9.4    | 6.8                      | 8.0    | 11.2                            | 11.3   | 9.4                     | 10.3   |
|                                   | SD | 2.9                           | 2.7    | 2.7                      | 2.5    | 2.4                             | 2.5    | 2.7                     | 2.7    |
| Digit Span forward, score         | M  | 6.9                           | 8.1    | 5.8                      | 6.3    | 8.2                             | 9.5    | 7.3                     | 8.8    |
|                                   | SD | 1.7                           | 1.9    | 1.3                      | 1.5    | 1.9                             | 2.2    | 2.0                     | 2.0    |
| Digit Span backward, score        | M  | 4.6                           | 5.6    | 3.8                      | 4.2    | 6.3                             | 7.2    | 5.4                     | 6.4    |
|                                   | SD | 1.4                           | 1.8    | 1.1                      | 1.4    | 1.8                             | 2.1    | 1.9                     | 1.8    |
| Spatial Span forward, score       | M  | 7.3                           | 8.3    | 6.2                      | 6.6    | 8.1                             | 8.6    | 7.5                     | 7.5    |
|                                   | SD | 1.6                           | 1.5    | 1.5                      | 1.7    | 2.0                             | 1.9    | 1.7                     | 2.0    |
| Spatial Span backward, score      | M  | 6.6                           | 7.0    | 4.6                      | 5.2    | 7.8                             | 8.5    | 6.6                     | 7.1    |
|                                   | SD | 1.5                           | 1.8    | 1.7                      | 1.5    | 1.6                             | 1.7    | 1.8                     | 2.1    |
| LM A – Immediate, score           | M  | 11.0                          | 11.7   | 8.8                      | 9.7    | 14.1                            | 14.3   | 12.1                    | 13.7   |
|                                   | SD | 3.0                           | 3.1    | 3.4                      | 3.8    | 3.6                             | 3.1    | 3.9                     | 3.4    |
| LM B1 – Immediate, score          | M  | 8.0                           | 9.5    | 6.9                      | 7.4    | 12.4                            | 13.7   | 9.7                     | 11.6   |
|                                   | SD | 3.3                           | 3.9    | 2.8                      | 3.2    | 3.6                             | 3.8    | 3.9                     | 3.2    |
| LM B2 – Immediate, score          | M  | 12.4                          | 14.7   | 9.9                      | 10.8   | 16.9                            | 18.4   | 13.9                    | 16.8   |
|                                   | SD | 4.2                           | 4.3    | 3.3                      | 4.0    | 3.8                             | 3.6    | 3.7                     | 3.6    |
| LM A – Delay, score               | M  | 8.4                           | 9.4    | 5.4                      | 6.1    | 11.5                            | 12.1   | 9.0                     | 10.1   |
|                                   | SD | 3.8                           | 4.2    | 3.8                      | 4.0    | 3.7                             | 4.0    | 4.2                     | 4.4    |
| LM B – Delay, score               | M  | 11.1                          | 13.2   | 7.8                      | 9.1    | 15.7                            | 17.2   | 12.2                    | 15.8   |
|                                   | SD | 4.2                           | 4.3    | 3.9                      | 4.3    | 4.0                             | 3.8    | 3.9                     | 3.6    |
| LM A – Recognition, score         | M  | 11.3                          | 11.4   | 9.6                      | 10.1   | 12.4                            | 12.4   | 11.0                    | 11.6   |
|                                   | SD | 2.0                           | 2.2    | 2.2                      | 2.0    | 2.0                             | 1.9    | 2.2                     | 1.9    |
| LM B – Recognition, score         | M  | 12.0                          | 12.7   | 10.9                     | 11.5   | 13.9                            | 14.2   | 12.5                    | 13.4   |
|                                   | SD | 2.0                           | 1.6    | 2.2                      | 1.9    | 1.3                             | 1.2    | 2.0                     | 1.4    |

|                                          |    |      |      |      |      |       |       |      |      |
|------------------------------------------|----|------|------|------|------|-------|-------|------|------|
| TAVEC 1st trial, score                   | M  | 7.1  | 6.9  | 5.5  | 5.6  | 7.4   | 7.5   | 5.8  | 7.1  |
|                                          | SD | 1.9  | 1.7  | 1.8  | 1.8  | 1.8   | 2.0   | 1.8  | 2.2  |
| TAVEC Learning, score                    | M  | 54.9 | 56.5 | 44.8 | 48.1 | 58.0  | 60.2  | 49.0 | 54.3 |
|                                          | SD | 8.0  | 7.9  | 11.2 | 9.7  | 8.3   | 7.8   | 9.9  | 10.5 |
| TAVEC Short Delay, score                 | M  | 11.7 | 11.7 | 8.4  | 9.8  | 12.4  | 13.3  | 9.8  | 10.8 |
|                                          | SD | 2.6  | 2.5  | 3.2  | 2.9  | 2.7   | 2.6   | 3.3  | 2.7  |
| TAVEC Short Delay-Clues, score           | M  | 13.0 | 12.9 | 9.8  | 11.0 | 13.6  | 14.2  | 11.4 | 11.9 |
|                                          | SD | 2.2  | 2.6  | 3.4  | 2.6  | 2.4   | 2.1   | 3.1  | 2.6  |
| TAVEC Long Delay, score                  | M  | 13.6 | 13.7 | 9.9  | 11.1 | 14.4  | 15.0  | 11.5 | 12.7 |
|                                          | SD | 2.1  | 2.2  | 3.8  | 3.0  | 2.0   | 1.8   | 3.3  | 3.2  |
| TAVEC Long Delay-Clues, score            | M  | 14.6 | 14.4 | 11.1 | 12.4 | 15.0  | 15.2  | 12.5 | 13.4 |
|                                          | SD | 1.6  | 1.9  | 3.7  | 2.7  | 1.5   | 1.3   | 3.1  | 3.1  |
| TAVEC Intrusions Delay, score            | M  | 3.9  | 3.7  | 5.3  | 5.4  | 3.0   | 3.5   | 3.7  | 4.4  |
|                                          | SD | 3.3  | 2.9  | 4.8  | 5.5  | 3.0   | 3.1   | 3.8  | 3.9  |
| TAVEC Intrusions Delay-Clues, score      | M  | 1.8  | 1.8  | 4.4  | 3.2  | 0.9   | 1.1   | 2.4  | 1.9  |
|                                          | SD | 1.9  | 2.1  | 3.7  | 3.4  | 1.2   | 1.2   | 2.5  | 1.9  |
| TAVEC Perseverations, score              | M  | 5.3  | 6.7  | 6.8  | 6.3  | 6.3   | 3.7   | 4.9  | 4.8  |
|                                          | SD | 6.2  | 5.9  | 6.7  | 5.7  | 6.7   | 3.6   | 3.7  | 3.5  |
| TAVEC Recognition Correct answers, score | M  | 15.5 | 15.7 | 14.8 | 15.0 | 15.7  | 15.8  | 15.2 | 15.4 |
|                                          | SD | 0.7  | 0.5  | 2.0  | 1.6  | 0.6   | 0.4   | 1.1  | 1.2  |
| TAVEC Recognition False Positives, score | M  | 1.0  | 1.0  | 2.9  | 1.7  | 0.5   | 0.6   | 1.1  | 1.1  |
|                                          | SD | 0.9  | 1.0  | 2.9  | 1.8  | 0.7   | 0.7   | 1.6  | 1.0  |
| VR I – Total score                       | M  | 78.3 | 82.0 | 52.2 | 55.9 | 88.4  | 89.6  | 70.9 | 76.7 |
|                                          | SD | 12.7 | 14.1 | 16.0 | 18.5 | 8.6   | 8.7   | 15.6 | 13.9 |
| VR II – Total score                      | M  | 62.9 | 67.0 | 27.9 | 31.9 | 76.0  | 80.1  | 45.8 | 55.8 |
|                                          | SD | 19.4 | 19.5 | 15.0 | 18.3 | 16.4  | 15.0  | 19.8 | 18.6 |
| VR-Copying, score                        | M  | 99.2 | 99.2 | 93.4 | 95.8 | 100.0 | 100.3 | 99.0 | 99.6 |
|                                          | SD | 3.6  | 2.6  | 8.4  | 7.0  | 2.5   | 3.0   | 3.4  | 3.0  |
| VR Total Recognition, score              | M  | 43.7 | 44.4 | 38.6 | 40.1 | 44.8  | 45.5  | 42.7 | 43.8 |
|                                          | SD | 3.1  | 3.0  | 3.1  | 3.3  | 2.3   | 2.4   | 3.1  | 2.8  |
| VR False Positives, score                | M  | 2.4  | 2.0  | 4.3  | 3.7  | 1.8   | 1.3   | 2.7  | 2.2  |
|                                          | SD | 2.1  | 1.7  | 2.7  | 3.2  | 1.4   | 1.1   | 2.3  | 1.9  |
| VR Visual discrimination, score          | M  | 6.5  | 6.4  | 6.3  | 6.7  | 6.7   | 6.6   | 6.7  | 6.7  |
|                                          | SD | 0.6  | 0.7  | 0.9  | 0.6  | 0.5   | 0.5   | 0.5  | 0.6  |
| Luria's HAM Right, score                 | M  | 15.2 | 17.9 | 9.9  | 10.8 | 17.1  | 19.4  | 13.3 | 15.9 |
|                                          | SD | 5.0  | 5.5  | 3.6  | 4.2  | 5.4   | 4.9   | 4.4  | 6.1  |
| Luria's HAM Left, score                  | M  | 16.6 | 18.3 | 10.7 | 11.7 | 17.8  | 20.0  | 13.9 | 16.2 |
|                                          | SD | 4.4  | 5.3  | 4.1  | 4.4  | 5.7   | 4.7   | 4.9  | 5.7  |
| Luria's – Coordination, score            | M  | 47.9 | 48.7 | 24.0 | 27.3 | 54.9  | 61.9  | 41.7 | 46.6 |
|                                          | SD | 17.3 | 15.9 | 14.4 | 12.9 | 15.6  | 16.9  | 17.0 | 18.4 |
| Block Design WAIS, score                 | M  | 32.6 | 37.3 | 19.3 | 22.9 | 43.3  | 46.4  | 30.3 | 34.7 |
|                                          | SD | 8.6  | 9.5  | 6.9  | 9.0  | 9.9   | 9.4   | 8.8  | 10.4 |

CR: cognitive reserve; YA: younger age; OA: older age; LowPF: low phonemic fluency performance; HighPF: high phonemic fluency performance. M: Mean; SD: Standard Deviation; BNT: Boston Naming Test (spontaneous responses); PCV: PC-Vienna System; PASAT: Paced Auditory Serial Addition Test; TMT A: Trial Making Test A; CTT: Color Trails Test; FRT: Facial Recognition Test; JLOT: Judgment of Line Orientation Test. LM: Logical Memory; VR: Visual Reproduction Test; Luria's HAM: Luria's Premotor Functions; Hand Alternative Movements; PF: phonemic fluency.
